# Supplementary material
Source: MDPI journal article supplement (https://www.mdpi.com/2077-1312/10/8/1135)
Supplement: s1 [file s1]

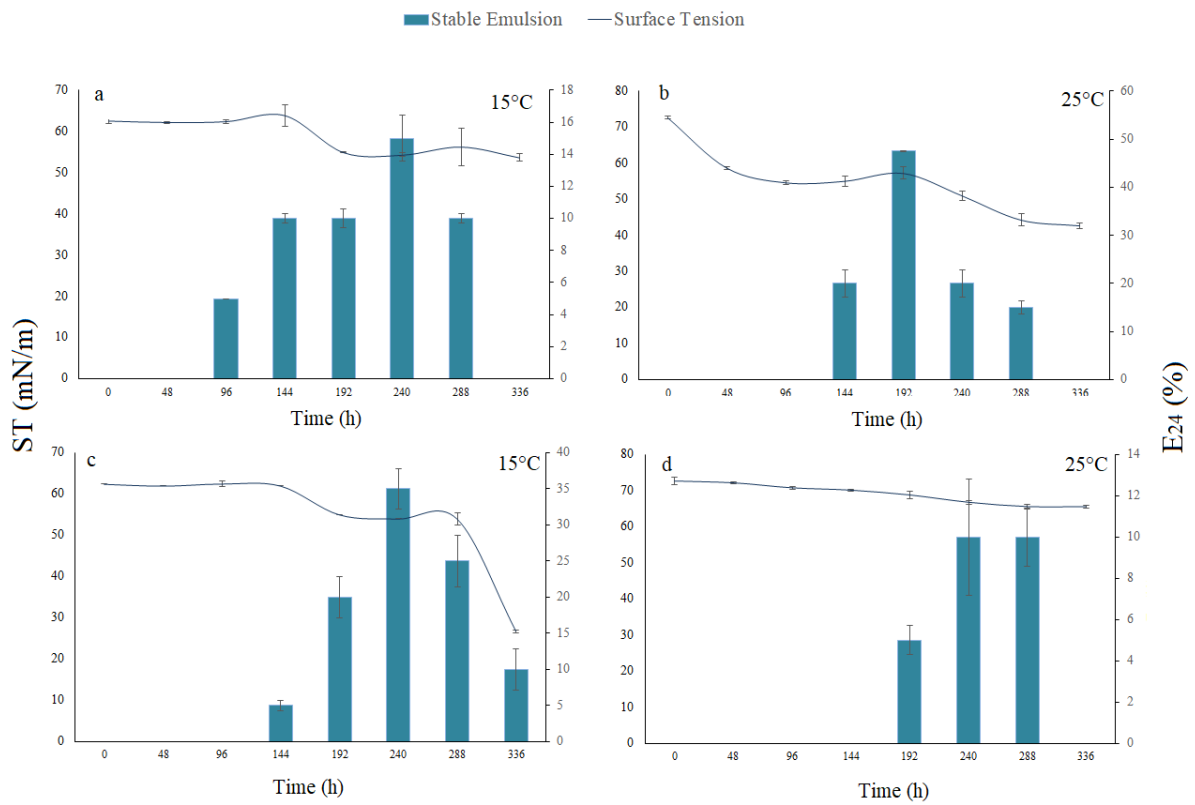

**Figure S1.** Production of stable emulsion and surface tension reduction by *Idiomarina* sp. A19 (a,b) and *Idiomarina* sp. 185 (c,d) during incubation in BHbp at 15°C and 25°C.
